# Supplementary material for: Estimating the Quality of Reprogrammed Cells Using ES Cell Differentiation Expression Patterns
Source: PLOS journal article supplement (doi:10.1371/journal.pone.0015336), 2011-01-11
Supplement: S11 (10.1371/journal.pone.0015336.s011) [file journal.pone.0015336.s011]

**Table S8 GO analysis of positive regulated genes in ES cell-derived Pancreatic islets cells Differentiation (GSE3653)**

| GO number  | Description                             | P-value | Gene                                                                                                                                                                                                                                                                                                           |
|------------|-----------------------------------------|---------|----------------------------------------------------------------------------------------------------------------------------------------------------------------------------------------------------------------------------------------------------------------------------------------------------------------|
| GO:0001501 | skeletal system development             | 3.4E-19 | Nab2,Tbx3,Ankrd1,Axin2,Bmp-1,Bmp4,Col1a1,Col9a1,Col5a2,Dlk1,Foxc1,Foxc2,Hoxa9,Hoxb2,Msx1,Igf1,Igf2,Igfbp5,Mglap,Mn1,Myc,Mef2c,Prrx1,Prrx2,Pitx1,Pdgfra,Pdgfrb,Ptn,Pcsk5,griPGH S,RBP,Zic1,Hhg1,Tgfb2,1110020H15Rik,Wnt5a,Zfhx1a,Zbtb16                                                                         |
| GO:0048736 | appendage development                   | 4.6E-10 | Tbx3,Bmp4,Bra,Dkk1,Mecom,Foxa2,Foxc1,Foxc2,1200010K03Rik,Gbx-2,Hoxa1,Hoxa9,Hoxb2,Msx1,Itga8,Mab21I2,Mbnl,Myc,Neurod1,Otx1,Prrx1,Prrx2,Pitx1,1110003O22Rik,Pcsk5,Pcdh8,Rfx4,RBP,Nr2f1,R75022,Zic1,Fnb2,Msx2,Hhg1,Cish3,Sdccag33,Tgfb1i1,1110020H15Rik,Twist,Vegfc,Wnt5a,Zfhx1a,Zbtb16                           |
| GO:0048732 | gland development                       | 6.2E-9  | CD44,Flt1,Gata6,Isl1,Jun,Klf4,9430010M06Rik,Tbx3,Apoa1,Bmp4,BraCav,Csf1,Ccnd1,Mecom,Foxa1,Foxa2,Foxc1,Foxc2,Foxd1,Fzd1,Gbx-2,Hoxa9,Hoxb2,Igf1,Lama1,Lox,Mglap,Nrp,Pitx1,Pdgfra,Pcsk5,griPGHS,Pcdh8,RBP,AI561871,Snai1,Hhg1,Cish3,Tnc,Tcf21,Tgfb1i1,Tgfb2,1110020H15Rik,Tgm1,Tgm2,Tnni1,Tnnt2,Twist,Vegfc,Wnt5a |
| GO:0035295 | tube development                        | 1.0E-11 | CD44,Flt1,Gata6,9430010M06Rik,Tbx3,Bmp4,Bra,Csf1,Foxa1,Foxa2,Foxc1,Foxc2,Foxd1,Gbx-2,Igf1,Lama1,Lox,Mglap,Nrp,Pdgfra,Pcsk5,RBP,Hhg1,Tcf21,1110020H15Rik,Tgm2,Twist,Wnt5a                                                                                                                                       |
| GO:0007155 | cell adhesion                           | 2.9E-7  | CD44,Frem1,Wisp1,AI853494,Cdh11,Col9a1,AI413331,Col6a1,Col6a2,AW229038,2410043F08Rik,BB099155,Igfbp7,Itga8,Itga9,Lama1,Ncam1,Nrp,NP2,2010012A22Rik,AI595373,Osf2-pending,Pcdh18,Pcdh19,Pcdh7,Pcdh8,Pcdhgc5,Arhb,Nid1,Tnc,Thbs1,Tgfb2,Tgfb1                                                                     |
| GO:0043009 | chordate embryonic development          | 1.3E-9  | Gata6,Tbx3,Ankrd1,Axin2,Bmp4,Bra,Capn2,Dlk1,Mecom,Foxa2,Foxc1,Foxc2,Gbx-2,Hba-a1,Hoxa9,Hoxb2,Msx1,Mbnl,Myhca,Prrx1,Prrx2,Pdgfra,Pdgfrb,Pcsk5,Pcdh8,RBP,Hhg1,Cish3,1100001C23Rik,1110020H15Rik,Twist,Zfhx1a                                                                                                     |
| GO:0007423 | sensory organ development               | 9.9E-10 | Irx5,Klf4,Meis1,Mrg1b,Sox1,Bmp4,Bra,Cryab,Foxc1,Foxc2,Gbx-2,Hoxa1,Hoxb2,Itga8,Mab21I2,Myc,Neurod1,Otx1,Prrx1,Prrx2,Pcsk5,RBP,Zic1,Apc,Hhg1,Cish3,Sdccag33,Tgfb2,1110020H15Rik,Zfhx1a                                                                                                                           |
| GO:0001655 | urogenital system development           | 3.4E-12 | CD44,Irx3,Pou3f3,Tbx3,ADAMTS-1,Afp,Bmp4,Cav,Csf1,Dmrta2,Foxa1,Foxc1,Foxc2,Foxd1,Fzd1,AI852300,Igf1,Itga8,Lama1,Nrp,Pdgfra,Pdgfrb,Pcsk5,RBP,Nid1,Apc,Slit2,Hhg1,Tnc,Tcf21,1110020H15Rik,Tgm2,Wnt5a,Zbtb16                                                                                                       |
| GO:0035272 | exocrine system development             | 2.0E-4  | Foxc1,Igf1,Igf2,Lama1,Nrp,Hhg1,Tgm2                                                                                                                                                                                                                                                                            |
| GO:0008191 | metalloendopeptidase inhibitor activity | 9.8E-3  | Lxn,Timp2,Timp3                                                                                                                                                                                                                                                                                                |
